# Supplementary material
Source: PubMed Central journal article supplement (PMC5917603)
Supplement: NIHMS959819-supplement-Suppllementary_materials.pdf [file NIHMS959819-supplement-Suppllementary_materials.pdf]

## Supplementary Materials for

### **The brain microenvironment mediates resistance in luminal breast cancer to PI3K inhibition through HER3 activation**

David P. Kodack, Vasileios Askoxylakis, Gino B. Ferraro, Qing Sheng, Mark Badeaux, Shom Goel, Xiaolong Qi, Ram Shankaraiah, Z. Alexander Cao, Rakesh R. Ramjiawan, Divya Bezwada, Bhushankumar Patel, Yongchul Song, Carlotta Costa, Kamila Naxerova, Christina S. F. Wong, Jonas Kloepper, Rita Das, Angela Tam, Jantima Tanboon, Dan G. Duda, C. Ryan Miller, Marni B. Siegel, Carey K. Anders, Melinda Sanders, Monica V. Estrada, Robert Schlegel, Carlos L. Arteaga, Elena Brachtel, Alan Huang, Dai Fukumura, Jeffrey A. Engelman,\* Rakesh K. Jain\*

\*Corresponding author. Email: jain@steele.mgh.harvard.edu (R.K.J.); jeffrey.engelman@novartis.com (J.A.E.)

Published 24 May 2017, *Sci. Transl. Med.* **9**, eaal4682 (2017)  
DOI: 10.1126/scitranslmed.aal4682

#### **This PDF file includes:**

- Fig. S1. The blood Gluc activity is directly correlated with tumor volume for each tumor model.
- Fig. S2. Liver BT474 tumors respond to buparlisib.
- Fig. S3. Microenvironment-dependent regulation of BC cells alters FOXO3 activity.
- Fig. S4. MDA-MB-361 brain lesions transiently respond to buparlisib.
- Fig. S5. HER3 expression is increased in BMs from HER2-positive BC.
- Fig. S6. Several NRG isoforms induce resistance to buparlisib.
- Fig. S7. NRG-1 is expressed in MFP and brain lesions.
- Table S1. Differential expression of HER3 in intracranial and extracranial lesions from unmatched patient clinical samples.
- Table S2. List of recombinant human growth factors screened for their ability to induce resistance to buparlisib.

## FIGURE S1

A)

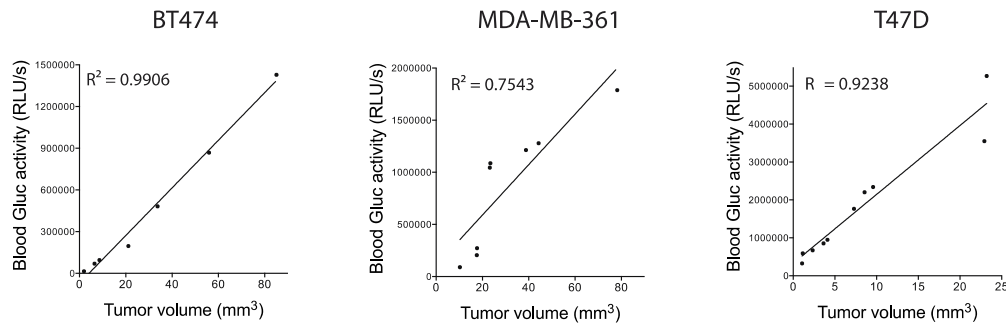

B)

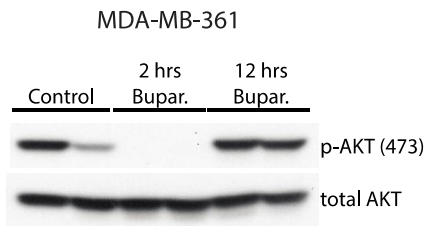

C)

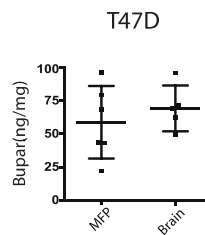

**Supplemental Figure 1. The blood Gluc activity is directly correlated with tumor volume for each tumor model.** (A) Blood Gluc activity is a reliable surrogate for breast cancer brain tumor volume. The correlation of blood Gluc activity and tumor volume, as measured by ultrasound imaging (US), is shown for BT474-Gluc (left) (n=7, Pearson  $r=0.9953$ ,  $R^2=0.9906$ ,  $p<0.0001$ ), MDA-MB-361-Gluc (middle) (n=8, Pearson  $r=0.8685$ ,  $R^2=0.7543$ , 95%-CI=0.42-0.98,  $p=0.005$ ), and T47D-Gluc (right) (n=10, Pearson  $r=0.9611$ ,  $R^2=0.9238$ ,  $p<0.0001$ ) tumors. (B) MDA-MB-361-Gluc BM tissue, collected at the indicated time points after a single dose of buparlisib, was analyzed for AKT phosphorylation. (C) Concentration of buparlisib in T47D-Gluc tumor tissue collected two hours after treatment.

**FIGURE S2**

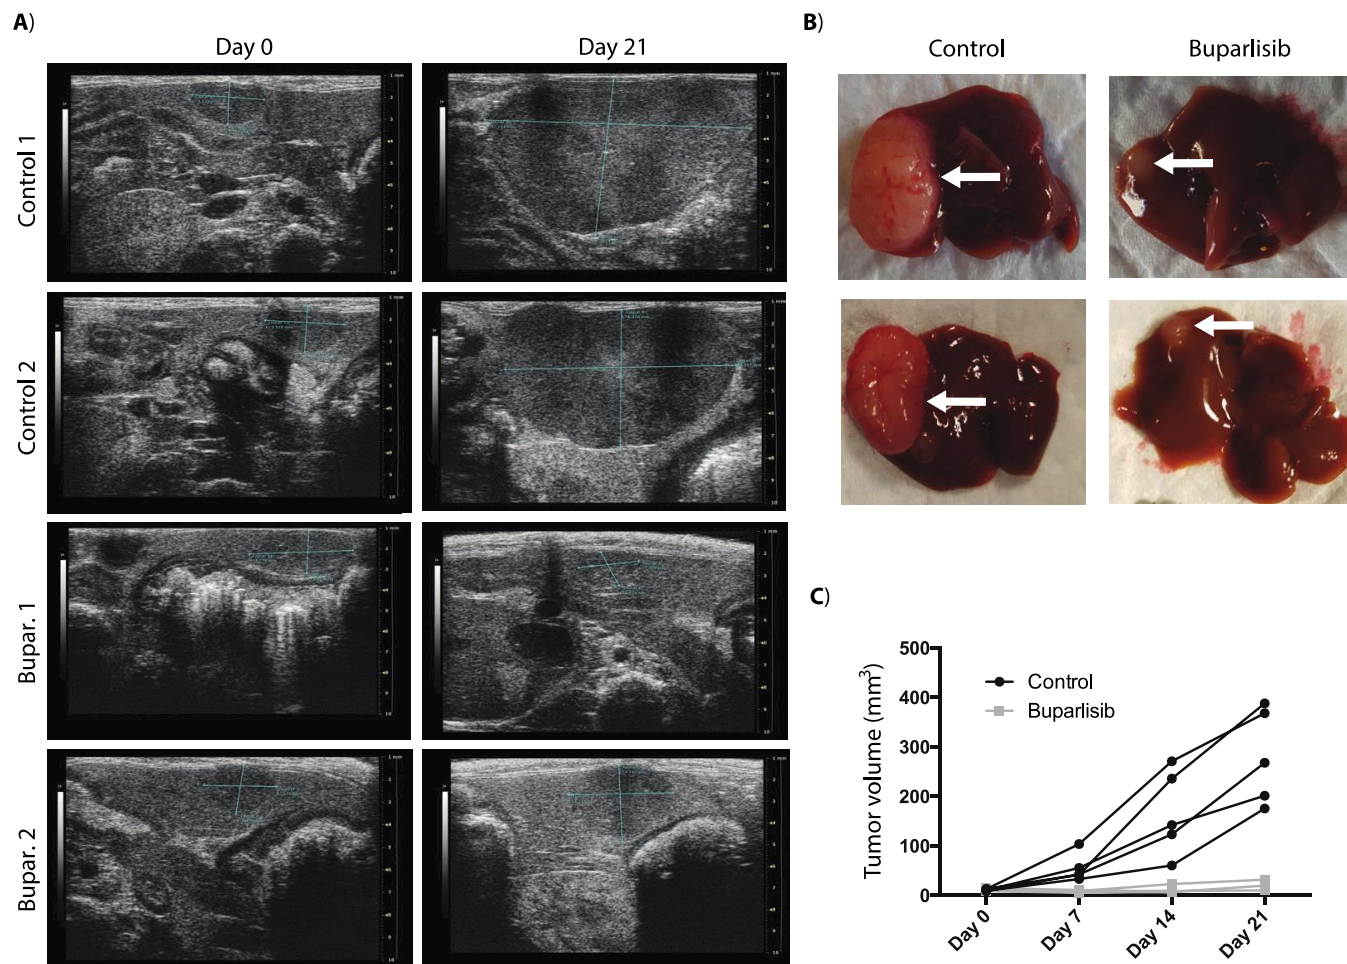

**Supplemental Figure 2. Liver BT474 tumors respond to buparlisib.** Differential response of established BT474 tumor lesions to buparlisib (BKM120) in the liver of female nude mice. Treatment with buparlisib (50 mg/kg p.o.) was initiated when tumors reached a size of  $\sim 10 \text{ mm}^3$ , as determined by ultrasound imaging (blue cross). (A) Representative ultrasonography images of size- and time-matched BT474-Gluc tumors treated with vehicle or buparlisib at day 0 and day 21. (B) Representative images of BT474 tumors in resected livers of control or buparlisib-treated mice. Tumor: white arrow. (C) Growth of BT474-Gluc tumors in the liver during treatment with buparlisib (50 mg/kg p.o. daily) or control vehicle (PEG 300) (n=5).

**FIGURE S3**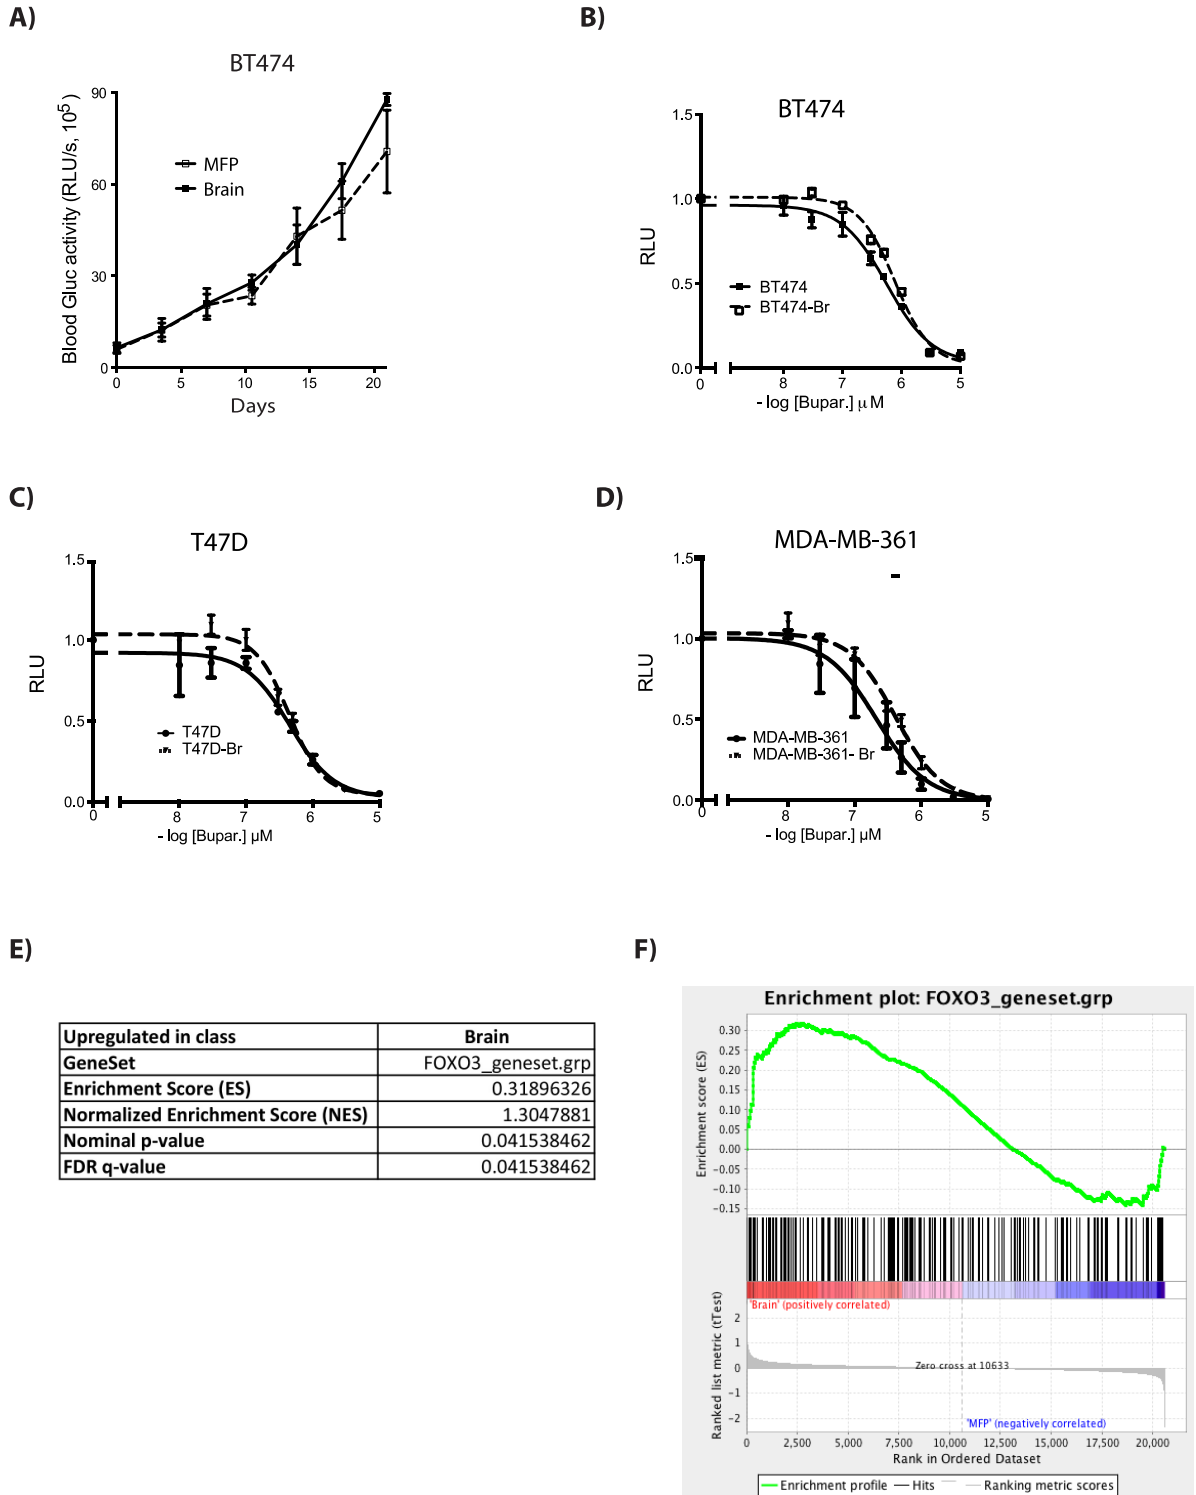

**Supplemental Figure 3. Microenvironment-dependent regulation of BC cells alters FOXO3 activity.** (A) The growth rate of BT474-Gluc MFP and brain tumors is indistinguishable. (B-D) BT474-Gluc (B), T47D-Gluc (C), and MDA-MB-361-Gluc (D) cells isolated from brain tumors (-Br) are similarly sensitive to PI3K inhibition in vitro as corresponding parental cells (the IC50, unpaired t-test, n=3, ns). (E) Gene set enrichment analysis results for a custom set of genes regulated by FOXO3 TF. (F) Enrichment plot showing that FOXO3a targets are up-regulated when BT474 tumors are grown in the brain vs. the MFP. FDR q-value <0.05.

**FIGURE S4**

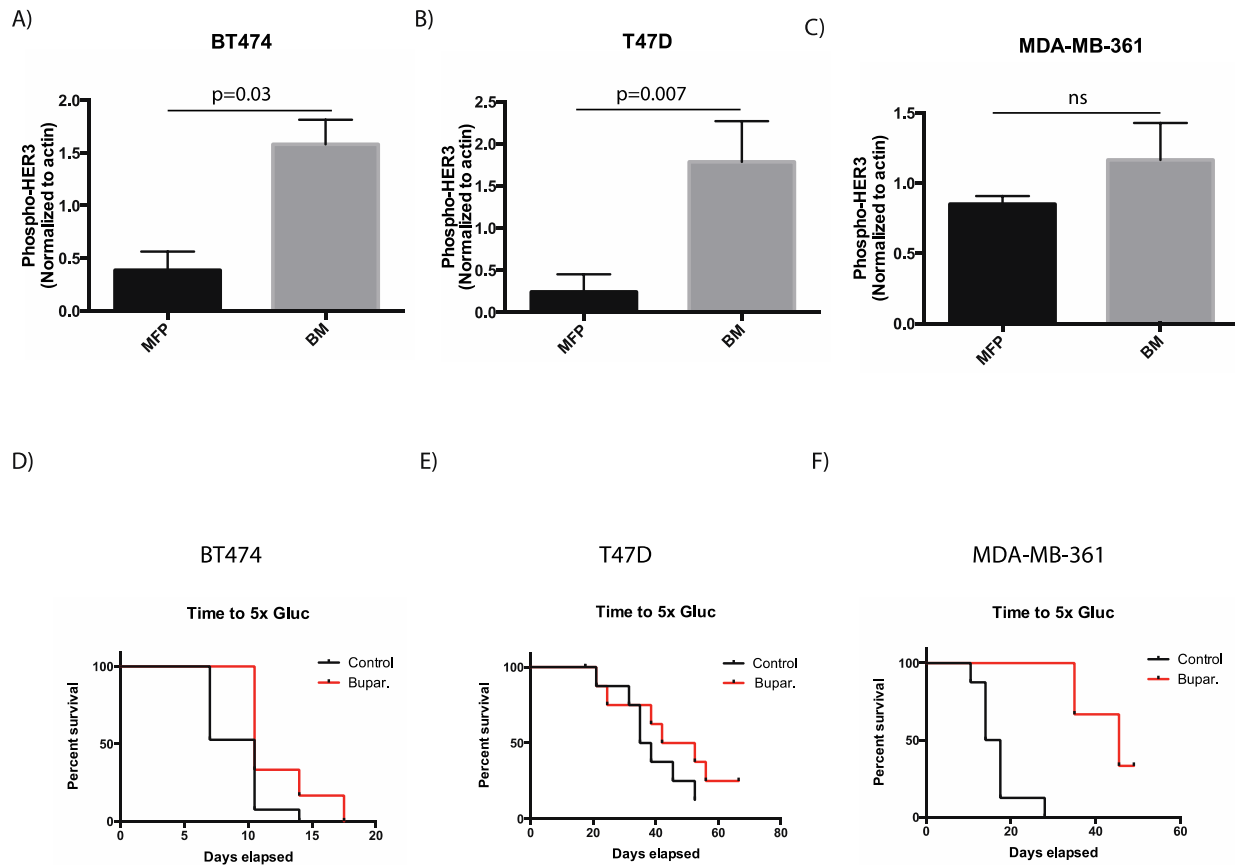

**Supplemental Figure 4. MDA-MB-361 brain lesions transiently respond to buparlisib.** (A-C) Quantification of phosphorylated HER3 by Western blot (normalized to  $\beta$ -actin) (unpaired t-test,  $n=3$ ) in BT474 (A), T47D (B), and MDA-MB-361 (C). (D-F) Time to 5x Gluc as surrogate for tumor progression of BT474 ( $n=19$  for control,  $n=6$  for buparlisib), T47D ( $n=9$  per group), and MDA-MD-361-Gluc ( $n=8$  for control,  $n=6$  for buparlisib) BM during treatment with buparlisib or control vehicle (PEG 300). The hazard ratio for MDA-MB-361-Gluc tumors was 0.21 (95%-CI=0.06-0.72), whereas the HRs for BT474-Gluc and T47D-Gluc tumors were 0.53 (95%-CI=0.22-1.24) and 0.59 (95%-CI=0.20-1.79), respectively.

**FIGURE S5**

A)

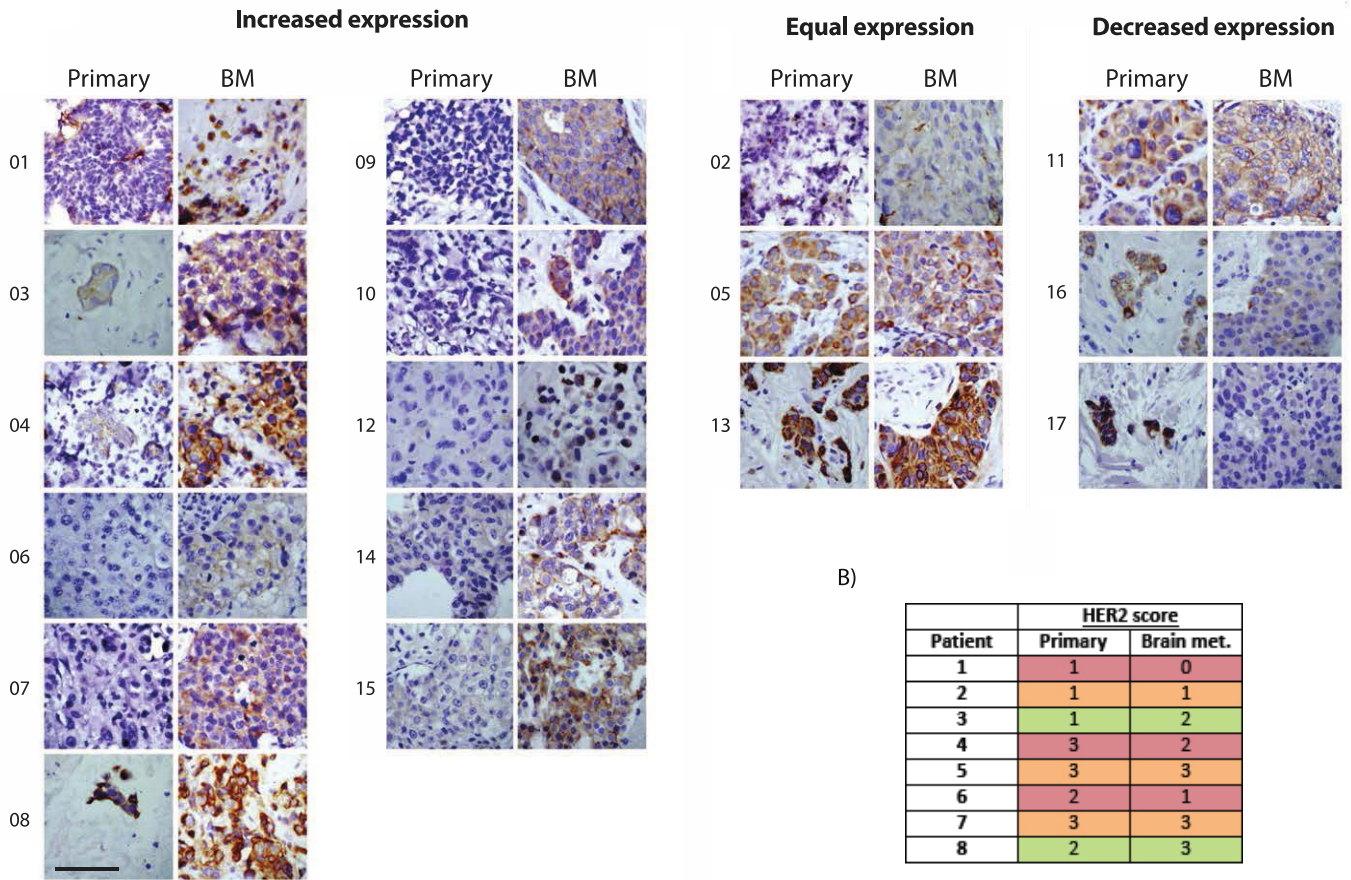

B)

| Patient | HER2 score |            |
|---------|------------|------------|
|         | Primary    | Brain met. |
| 1       | 1          | 0          |
| 2       | 1          | 1          |
| 3       | 1          | 2          |
| 4       | 3          | 2          |
| 5       | 3          | 3          |
| 6       | 2          | 1          |
| 7       | 3          | 3          |
| 8       | 2          | 3          |

|  |           |
|--|-----------|
|  | Decrease  |
|  | No change |
|  | Increase  |

**Supplemental Figure 5. HER3 expression is increased in BMs from HER2-positive BC.** (A) Representative IHC images for matched human primary and brain metastatic HER2-positive breast tumor tissue stained for HER3 (scale bar = 200  $\mu$ m). (B) Quantification of whole tissue section IHC analysis of HER2 protein in matched human primary and brain metastatic HER2-positive breast tumor tissue.

# FIGURE S6

A)

| NRG1 and NRG2 isoforms included in the screen |                                                                      |             |                    |
|-----------------------------------------------|----------------------------------------------------------------------|-------------|--------------------|
| GENE_SYMBOL                                   | GENE_DESCRIPTION                                                     | NM_FROM_GWC | PROTEIN_REFSEQ_ACC |
| NRG1                                          | Homo sapiens neuregulin 1 (NRG1), transcript variant SMDF, mRNA      | NM_013959.3 | NP_039253.1        |
| NRG2                                          | Homo sapiens neuregulin 2 (NRG2), transcript variant 1, mRNA         | NM_004883.2 | NP_004874.1        |
| NRG2                                          | Homo sapiens neuregulin 2 (NRG2), transcript variant 2, mRNA         | NM_013981.3 | NP_053584.1        |
| NRG1                                          | Homo sapiens neuregulin 1 (NRG1), transcript variant HRG-beta2, mRNA | NM_013957.3 | NP_039251.2        |
| NRG2                                          | Homo sapiens neuregulin 2 (NRG2), transcript variant 3, mRNA         | NM_013982.2 | NP_053585.1        |
| NRG1                                          | Homo sapiens neuregulin 1 (NRG1), transcript variant SMDF, mRNA      | NM_013959.3 | NP_039253.1        |
| NRG1                                          | Homo sapiens neuregulin 1 (NRG1), transcript variant HRG-beta1, mRNA | NM_013956.3 | NP_039250.2        |
| NRG1                                          | Homo sapiens neuregulin 1 (NRG1), transcript variant HRG-beta3, mRNA | NM_013958.3 | NP_039252.2        |
| NRG1                                          | Homo sapiens neuregulin 1 (NRG1), transcript variant HRG-gamma, mRNA | NM_004495.3 | NP_004486.2        |
| NRG1                                          | Homo sapiens neuregulin 1 (NRG1), transcript variant ndf43, mRNA     | NM_013960.3 | NP_039254.1        |
| NRG1                                          | Homo sapiens neuregulin 1 (NRG1), transcript variant HRG-alpha, mRNA | NM_013964.3 | NP_039258.1        |

B)

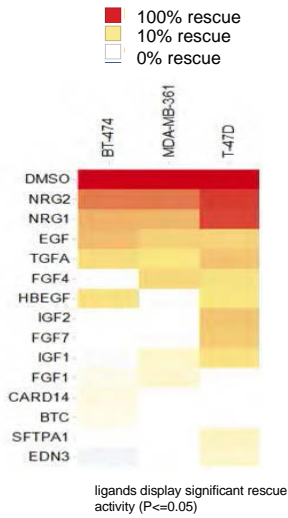

C)

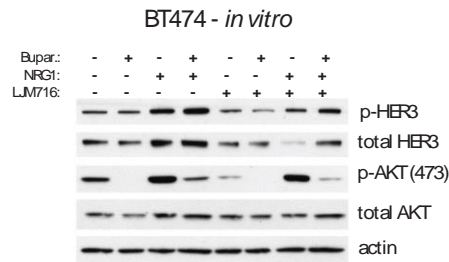

**Supplemental Figure 6. Several NRG isoforms induce resistance to buparlisib.** NRGs induce resistance to PI3K inhibition in BT474, MDA-MB-361, and T47D breast cancer cells. (A) List of NRG-1 and -2 isoforms used in growth factor screen. (B) List of secreted proteins that display significant *in vitro* rescue activity of indicated breast cancer cells from buparlisib. The statistical probability score of the rescue % value was also calculated:  $p\text{-value} = \text{Chidist} [Z(\text{drug}+\text{supe})^2, 1]$ . Secreted proteins that had rescue  $\geq 20\%$  with  $P \leq 0.05$  were labeled in each scatter plot (Fig. 3A). (C) Analysis of HER3 and AKT phosphorylation in HER2-amplified BT474-Gluc cells (*in vitro*) untreated or treated for 2 hours with NRG1, buparlisib, LJM716, or their combination.

**FIGURE S7**

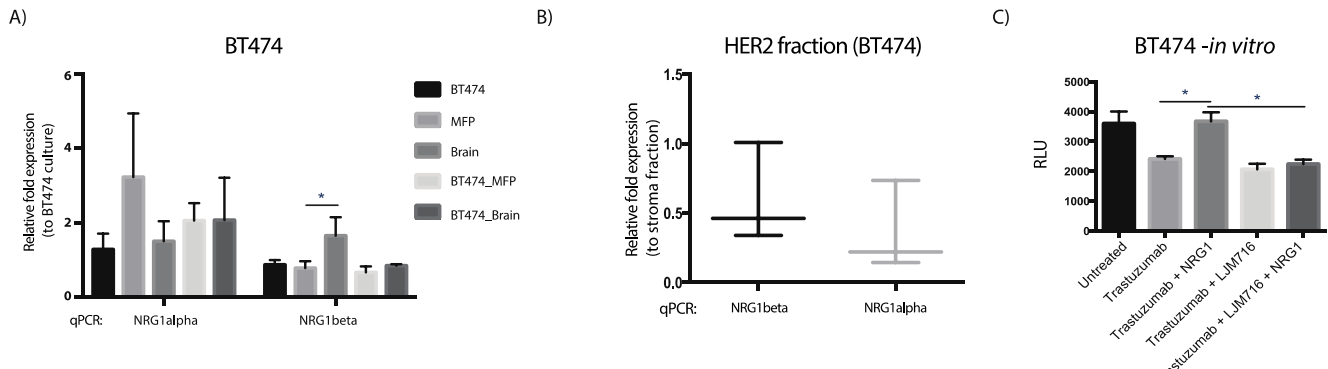

**Supplemental Figure 7. NRG-1 is expressed in MFP and brain lesions.** (A) Quantification of *NRG1*  $\alpha$  and  $\beta$  mRNA in the MFP or brain (normal and BT474 tumor) of athymic nude mice relative to cultured BT474 cells (n = 3 per group, unpaired t-test, \*p=0.0123). (B) Quantification of *NRG1*  $\alpha$  and  $\beta$  mRNA in HER2-positive BT474 cells from BM enriched by FACS, relative to HER2-negative stromal cells (n = 3 per group). (C) CellTiter-Glo luminescence viability measurements of BT474-Gluc cells exposed to the indicated conditions for 5 days (RLU/s, Relative Light Units per second). (One-way ANOVA, n=3, \*p<0.05). Data are displayed as mean  $\pm$  SD.



**TABLE S1**

**Supplemental Table 1. Differential expression of HER3 in intracranial and extracranial lesions from unmatched patient clinical samples.** IHC analysis of HER3 protein in unmatched human primary, extracranial, and brain metastatic HER2-positive breast tumor tissue.

|             | <b>HER3 score</b> | <b>Primary (N=10)</b> | <b>Extracranial (N=9)</b> | <b>Brain (N=13)</b> |
|-------------|-------------------|-----------------------|---------------------------|---------------------|
| <b>HER3</b> | <b>0</b>          | 5                     | 1                         | 0                   |
|             | <b>1</b>          | 2                     | 4                         | 5                   |
|             | <b>2</b>          | 2                     | 2                         | 7                   |
|             | <b>3</b>          | 1                     | 7                         | 1                   |

**TABLE S2**

**Supplemental Table 2. List of recombinant human growth factors screened for their ability to induce resistance to buparlisib.**

|         |          |         |        |          |        |
|---------|----------|---------|--------|----------|--------|
| A1BG    | EGFL6    | GPC3    | LTA    | RNASE1   | VCAN   |
| A2M     | ELAC1    | GPC5    | MAPRE1 | S100A13  | VEGFA  |
| AMH     | ELN      | GRN     | MEPE   | SC65     | VEGFB  |
| ANGPTL4 | EREG     | HBEGF   | MFAP   | SDC1     | VEGFC  |
| ANK1    | ESM1     | HGF     | MMP13  | SDC2     | VGF    |
| AREG    | FBLN2    | HMSD    | MRPL52 | SDC4     | WISP1  |
| ARTN    | FBLN5    | HSD17B3 | MSTN   | SERPINA9 | WNT1   |
| BCAN    | FGF1     | IFNA10  | MTRF1L | SERPINB2 | WNT10A |
| BGLAP   | FGF10    | IFNA13  | MUC3A  | SERPINH1 | WNT10B |
| BMP1    | FGF10    | IFNA14  | NDP    | SFTPA    | WNT11  |
| BMP10   | FGF12    | IFNA16  | NODAL  | SGCD     | WNT2   |
| BMP15   | FGF13    | IFNA17  | NOV    | SHH      | WNT2B  |
| BMP2    | FGF16    | IFNA2   | NRG1   | SNED1    | WNT3A  |
| BMP3    | FGF17    | IFNA21  | NRG2   | SPOCK1   | WNT4   |
| BMP4    | FGF19    | IFNA5   | NRG3   | SPOCK2   | WNT5A  |
| BMP5    | FGF20    | IFNA6   | NRG4   | SPOCK3   | WNT5B  |
| BMP6    | FGF21    | IFNA7   | NRP1   | SPRY1    | WTN6   |
| BMP7    | FGF22    | IFNA8   | NRP2   | SPRY2    | WNT7A  |
| BTBD17  | FGF23    | IFNB1   | NRTN   | SPRY3    | WNT7B  |
| BTC     | FGF3     | IFNW1   | OGN    | ST3GAL3  | WNT8A  |
| C1QTNF4 | FGF4     | IGF1    | OMD    | TBC1D28  | WNT8B  |
| CARD14  | FGF5     | IGF2    | OPTC   | TCN2     | WNT9A  |
| CSF1    | FGF7     | IHH     | ORM1   | TGFA     | WNT9B  |
| CSF2    | FGF8     | IL10    | OSTN   | TGFB1    |        |
| CTGF    | FGF9     | IL17RE  | PDGFA  | TGFB3    |        |
| CTSH    | FGFBP1   | IL1A    | PDGFB  | THPO     |        |
| CYR61   | FGG      | IL2     | PDGFD  | TMEFF1   |        |
| DEFB1   | FGL1     | IL21    | PDGFRA | TMEFF2   |        |
| DEFB136 | FIBP     | IL26    | PDGFRB | TMEM99   |        |
| DHH     | FLJ37512 | IL3     | PGF    | TNFSF10  |        |
| EDN1    | FLT3LG   | IL34    | PIGF   | TNFSF11  |        |
| EDN2    | FRS2     | IL4     | PILRB  | TNFSF12  |        |
| EDN3    | GDF10    | IL6     | POFUT1 | TNFSF13  |        |
| EFNA1   | GDF15    | ITFG1   | POFUT2 | TNFSF14  |        |
| EFNA2   | GDF2     | KISS1   | PROK1  | TNFSF4   |        |
| EFNA3   | GDF3     | KITLG   | PSIP1  | TNFSF8   |        |
| EFNA4   | GDF5     | LECT1   | PTX3   | TNFSF9   |        |
| EFNA5   | GDF6     | LECT2   | RELT   | TPO      |        |
| EFNB2   | GDF9     | LEFTY1  | RETN   | TSLP     |        |
| EFNB3   | GDNF     | LEFCT2  | RHEGF  | UBA5     |        |
